# Supplementary material
Source: publisher site journal article supplement (https://static.cambridge.org/content/id/urn:cambridge.org:id:article:S1352465820000752/resource/name/S1352465820000752supp002.docx)
Supplement: Supplementary file 1 [file S1352465820000752supp002.docx]

**Appendix B: Visual Analogue Scales based on the CBT model of MUS.**

Not at all A moderate amount A significant amount

How much do you believe?

- What the doctor has said?

0--------|--------|--------|--------|--------50--------|--------|--------|--------|--------100

- That it is likely your child has an undetected medical illness?

0--------|--------|--------|--------|--------50--------|--------|--------|--------|--------100

- That any undetected illness is serious?

0--------|--------|--------|--------|--------50--------|--------|--------|--------|--------100

Do you feel?

- Worried about your child’s health

0--------|--------|--------|--------|--------50--------|--------|--------|--------|--------100

- Powerless about your child’s health

0--------|--------|--------|--------|--------50--------|--------|--------|--------|--------100

- Distressed about your child’s health

0--------|--------|--------|--------|--------50--------|--------|--------|--------|--------100

How likely are you to?

- Seek another medical opinion

0--------|--------|--------|--------|--------50--------|--------|--------|--------|--------100

- Request further tests or investigations

0--------|--------|--------|--------|--------50--------|--------|--------|--------|--------100

- Encourage them to rest

0--------|--------|--------|--------|--------50--------|--------|--------|--------|--------100

- Prevent them from taking part in their daily activities

0--------|--------|--------|--------|--------50--------|--------|--------|--------|--------100
